# Supplementary material
Source: PubMed Central journal article supplement (PMC8206622)
Supplement: mmc1.pdf [file mmc1.pdf]

# Supplementary Fig. S1

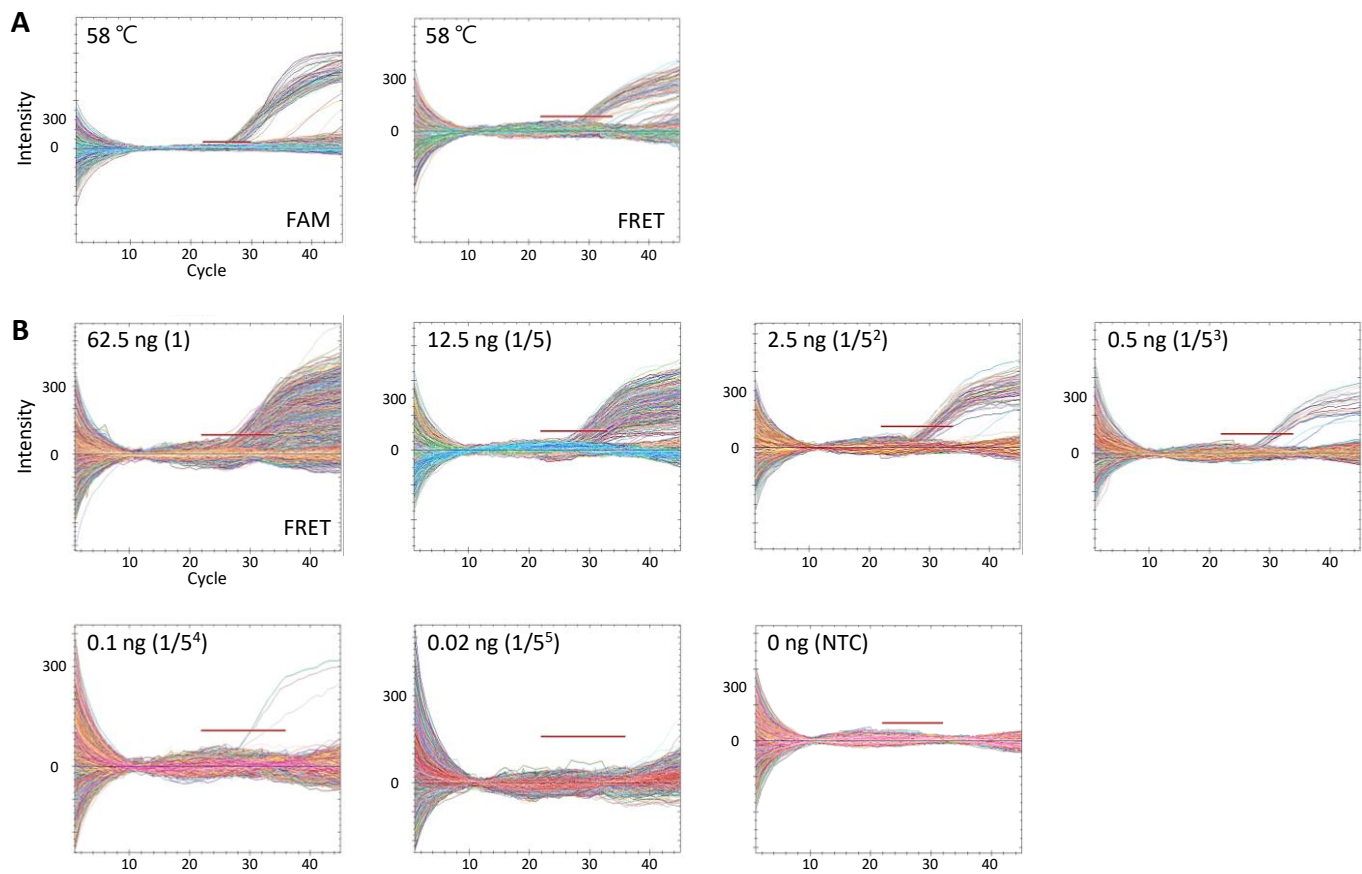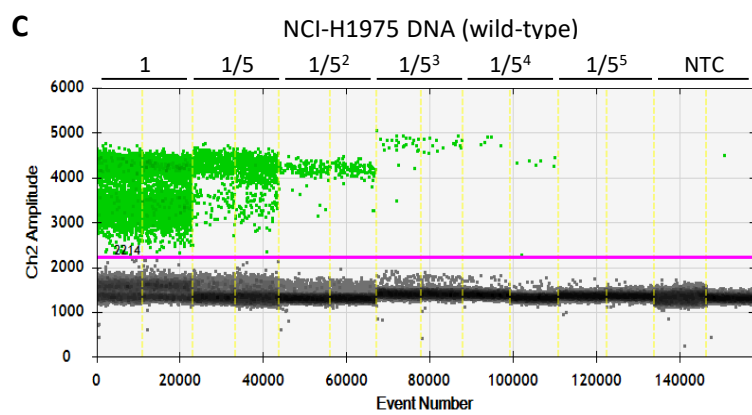

# Supplementary Fig. S2

**A**

NCI-H1975 DNA (T790M) - QX200

| Dilution factors | Average | SD    | Fold change | CV (%) |
|------------------|---------|-------|-------------|--------|
| 1                | 581.43  | 46.33 | 0.18        | 7.97   |
| 1/5              | 102.43  | 22.37 |             |        |
| 1/5 <sup>2</sup> | 26.41   | 9.50  | 0.22        | 35.96  |
| 1/5 <sup>3</sup> | 5.94    | 5.09  |             |        |
| NTC              | 0.27    | 0.72  |             |        |

NCI-H1975 DNA (T790M) - LOAA

| Dilution factors | Average | SD    | Fold change | CV (%) |
|------------------|---------|-------|-------------|--------|
| 1                | 557.98  | 44.77 | 0.20        | 8.02   |
| 1/5              | 112.29  | 13.45 |             |        |
| 1/5 <sup>2</sup> | 21.87   | 4.05  | 0.17        | 18.52  |
| 1/5 <sup>3</sup> | 3.62    | 1.53  |             |        |
| NTC              | 0.00    | 0.00  |             |        |

**B**

NCI-H1975 DNA (T790M) - QX200

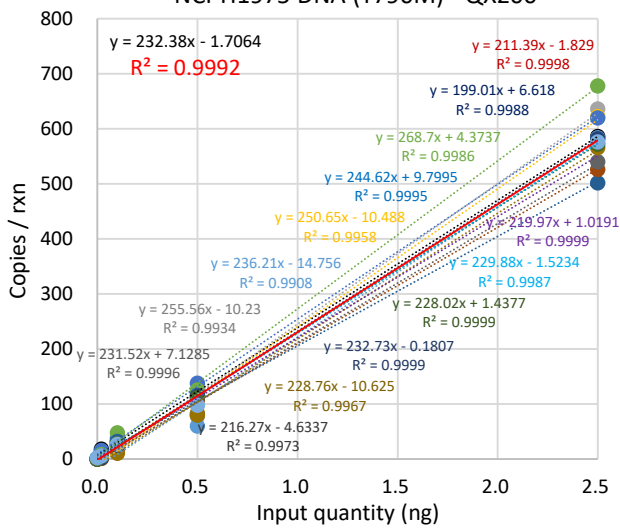

NCI-H1975 DNA (T790M) - LOAA

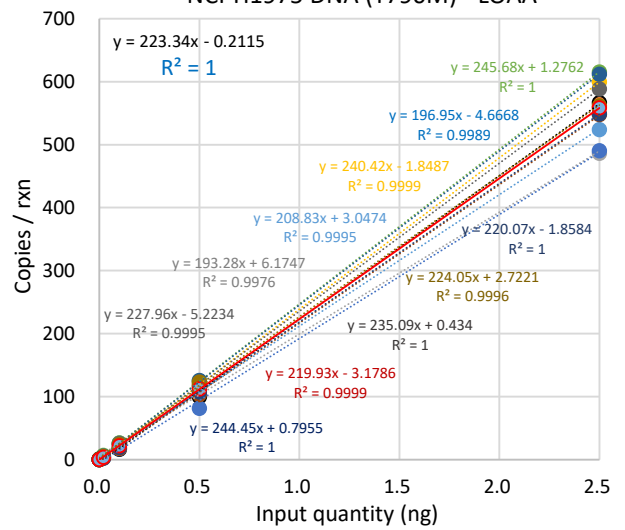

# Supplementary Fig. S3

**A**

SARS-CoV-2 RNA (RdRP-1) - QX200

| Dilution factors | Average | SD    | Fold change | CV (%) |
|------------------|---------|-------|-------------|--------|
| 1                | 267.27  | 22.28 | 0.20        | 8.33   |
| 1/5              | 54.36   | 9.50  |             |        |
| 1/5 <sup>2</sup> | 14.53   | 3.68  | 0.27        | 25.34  |
| 1/5 <sup>3</sup> | 4.04    | 2.09  | 0.28        | 51.82  |
| NTC              | 0.00    | 0.00  |             |        |

SARS-CoV-2 RNA (RdRP-1) - LOAA

| Dilution factors | Average | SD    | Fold change | CV (%) |
|------------------|---------|-------|-------------|--------|
| 1                | 281.78  | 21.01 | 0.20        | 7.46   |
| 1/5              | 56.00   | 4.22  |             |        |
| 1/5 <sup>2</sup> | 11.18   | 1.20  | 0.20        | 10.76  |
| 1/5 <sup>3</sup> | 2.74    | 0.96  | 0.24        | 35.24  |
| NTC              | 0.00    | 0.00  |             |        |

**B**

SARS-CoV-2 RNA (RdRP-1) - QX200

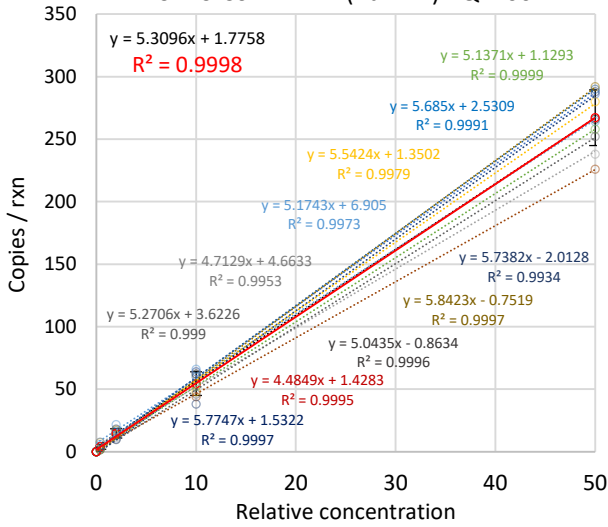

SARS-CoV-2 RNA (RdRP-1) - LOAA

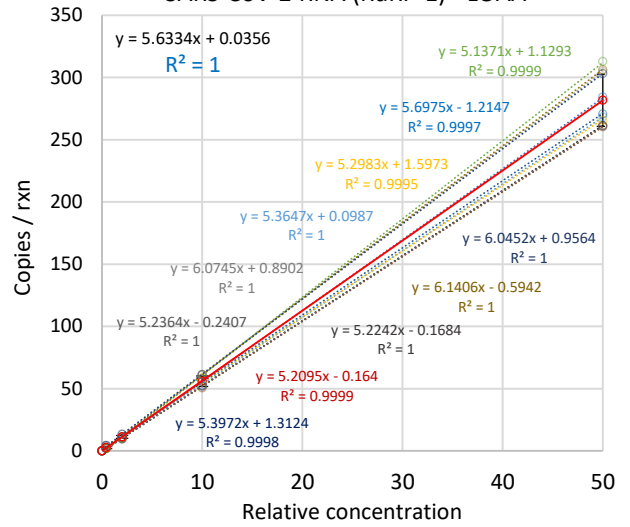

# Supplementary Fig. S4

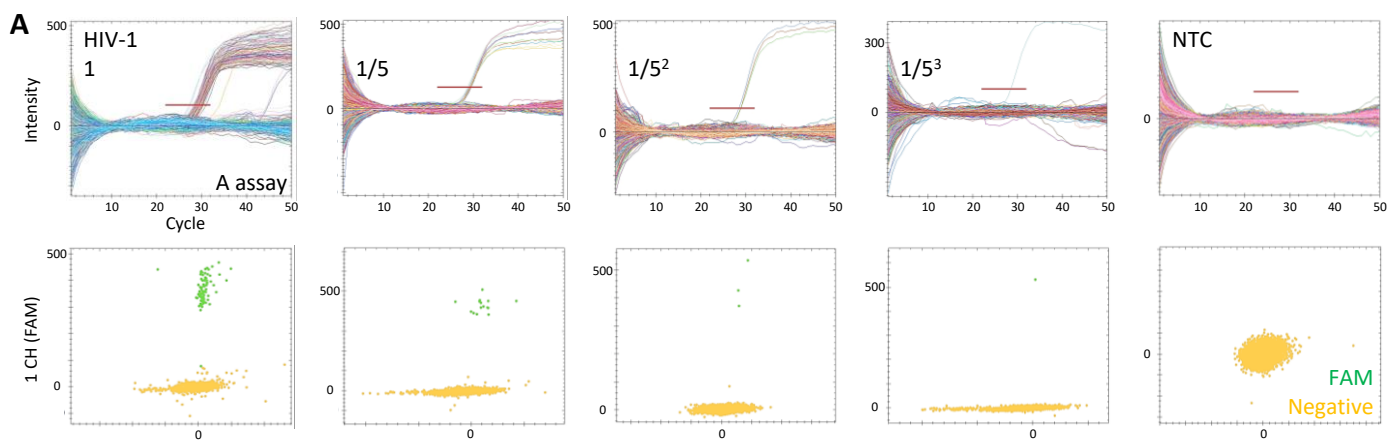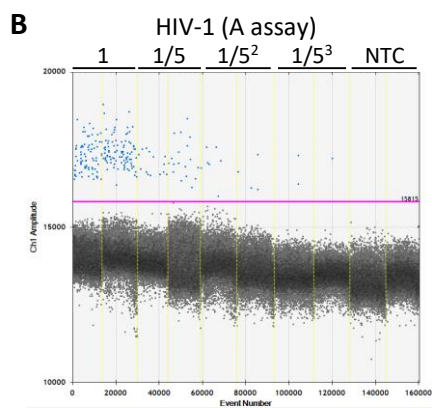

# Supplementary Fig. S5

**A**

HIV-1 RNA (A assay) - QX200

| Dilution factors | Average | SD    | Fold change | CV (%) |
|------------------|---------|-------|-------------|--------|
| 1                | 136.50  | 5.66  | 0.20        | 4.15   |
| 1/5              | 27.67   | 10.44 |             | 37.74  |
| 1/5 <sup>2</sup> | 5.57    | 3.71  | 0.27        | 66.65  |
| 1/5 <sup>3</sup> | 1.50    | 1.28  |             | 85.37  |
| NTC              | 0.00    | 0.00  |             |        |

HIV-1 RNA (A assay) - LOAA

| Dilution factors | Average | SD    | Fold change | CV (%) |
|------------------|---------|-------|-------------|--------|
| 1                | 154.69  | 12.41 | 0.19        | 8.02   |
| 1/5              | 29.24   | 3.05  |             | 10.44  |
| 1/5 <sup>2</sup> | 5.71    | 1.56  | 0.22        | 27.27  |
| 1/5 <sup>3</sup> | 1.27    | 1.13  |             | 88.95  |
| NTC              | 0.00    | 0.00  |             |        |

**B**

HIV-1 RNA (A assay) - QX200

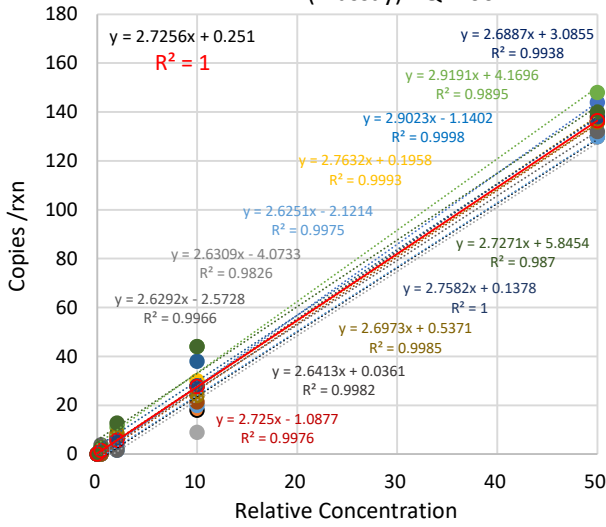

HIV-1 RNA (A assay) - LOAA

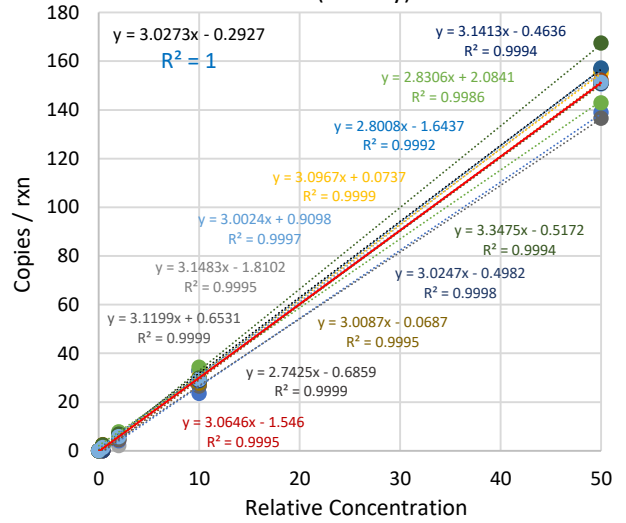

# Supplemental Fig. S6

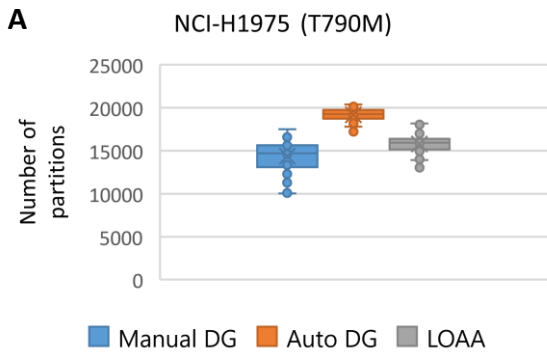

NCI-H1975 DNA (T790M)

| Dilution factors | QX200     |           | LOAA      |           |
|------------------|-----------|-----------|-----------|-----------|
|                  | Average   | SD        | Average   | SD        |
| 1                | 2.47.E-02 | 1.96.E-03 | 1.60.E-02 | 1.28.E-03 |
| 1/5              | 4.36.E-03 | 9.55.E-04 | 3.22.E-03 | 3.84.E-04 |
| 1/5 <sup>2</sup> | 1.12.E-03 | 4.08.E-04 | 6.26.E-04 | 1.18.E-04 |
| 1/5 <sup>3</sup> | 2.54.E-04 | 2.19.E-04 | 1.02.E-04 | 4.47.E-05 |
| NTC              | 1.13.E-05 | 3.00.E-05 | 0.00.E+00 | 0.00.E+00 |

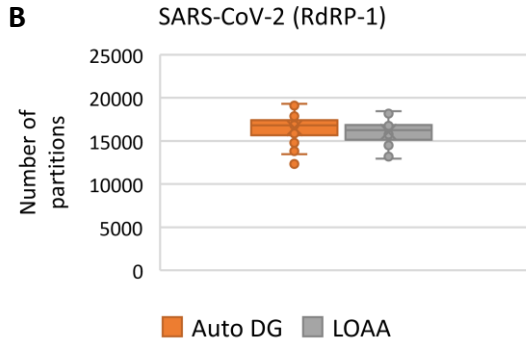

SARS-CoV-2 RNA (RdRP-1)

| Dilution factors | QX200     |           | LOAA      |           |
|------------------|-----------|-----------|-----------|-----------|
|                  | Average   | SD        | Average   | SD        |
| 1                | 1.14.E-02 | 9.46.E-04 | 8.08.E-03 | 6.02.E-04 |
| 1/5              | 2.32.E-03 | 3.99.E-04 | 1.61.E-03 | 1.21.E-04 |
| 1/5 <sup>2</sup> | 6.18.E-04 | 1.56.E-04 | 3.20.E-04 | 3.44.E-05 |
| 1/5 <sup>3</sup> | 1.73.E-04 | 9.01.E-05 | 7.85.E-05 | 2.76.E-05 |
| NTC              | 0.00.E+00 | 0.00.E+00 | 0.00.E+00 | 0.00.E+00 |

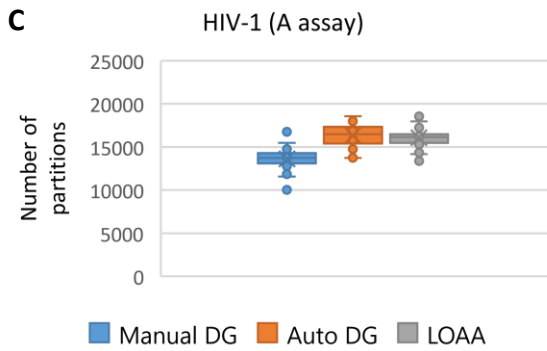

HIV-1 RNA (A assay)

| Dilution factors | QX200     |           | LOAA      |           |
|------------------|-----------|-----------|-----------|-----------|
|                  | Average   | SD        | Average   | SD        |
| 1                | 5.74.E-03 | 2.38.E-04 | 4.43.E-03 | 3.55.E-04 |
| 1/5              | 1.17.E-03 | 4.44.E-04 | 8.38.E-04 | 8.75.E-05 |
| 1/5 <sup>2</sup> | 2.41.E-04 | 1.55.E-04 | 1.64.E-04 | 4.46.E-05 |
| 1/5 <sup>3</sup> | 6.38.E-05 | 5.47.E-05 | 3.63.E-05 | 3.24.E-05 |
| NTC              | 0.00.E+00 | 0.00.E+00 | 0.00.E+00 | 0.00.E+00 |
